# Supplementary material
Source: publisher figshare collection journal article supplement (https://acs.figshare.com/ndownloader/files/4055203)
Supplement: Supplementary file 1 [file 4055203]

Supplemental Figure 1. QuickTime movies of fluorescence changes of eroGFP-iL after treatment with diamide or DTT for 15 min. Real-time changes in fluorescence of 3T3-L1-eroGFP1-iL fibroblasts monitored using epifluorescence microscopy at baseline and after treatment with 1 mM diamide or 1 mM DTT for 1, 5, 10, and 15 min at 37<sup>0</sup>C. Cells were excited with light from a mercury lamp through a 380±5 nm bandpass filter or a 455±15 nm bandpass filter and epifluorescence collected through a 510±10 nm bandpass filter.

File name: Diamide\_380nm\_half\_fps.qt  
Treatment: 1 mM diamide  
Excitation: 380±5 nm

File name: Diamide\_450nm\_half\_fps.qt  
Treatment: 1 mM diamide  
Excitation: 455±15 nm

File name: DTT\_380nm\_half\_fps.qt  
Treatment: 1 mM DTT  
Excitation: 380±5 nm

File name: DTT\_450nm\_half\_fps.qt  
Treatment: 1 mM DTT  
Excitation: 455±15 nm
